## Novel cryo-balloon ablation technology for pulmonary vein isolation in patients with atrial fibrillation: preliminary experience from a multicenter clinical practice

Tondo C.<sup>1</sup>; Stabile G.<sup>2</sup>; Filannino P.<sup>3</sup>; Moltrasio M.<sup>1</sup>; De Simone A.<sup>2</sup>; Artale P.<sup>3</sup>; Fassini G.<sup>1</sup>; La Rocca V.<sup>2</sup>; Bianchi S.<sup>4</sup>; Perna F.<sup>5</sup>; Tundo F.<sup>1</sup>; Colella J.<sup>3</sup>; Iuliano A.<sup>2</sup>; Malacrida M.<sup>6</sup>; Iacopino S.<sup>3</sup>

<sup>1</sup>Centro Cardiologico Monzino, IRCCS, Milan, Italy

<sup>2</sup>Casa di cura San Michele, Maddaloni, Italy

<sup>3</sup>Maria Cecilia Hospital, Cotignola, Italy

<sup>4</sup>Giovanni Calibita Fatebenefratelli Hospital, Rome, Italy

<sup>5</sup>Fondazione Policlinico Universitario Gemelli IRCCS, Catholic University, Rome, Italy

<sup>6</sup>Boston Scientific, Milan, Italy

**Funding Acknowledgements:** Type of funding sources: None.

**Background:** Complete electrical pulmonary vein isolation (PVI) by cryo-balloon approach is a well-established ablation strategy of atrial fibrillation (AF). Recently, a new cryoablation system (POLARx) with unique features has been made available for clinical use. To date, no data exist on procedural characteristics of this system in a multicentric clinical practice.

**Purpose:** We aimed to characterize the initial experience of this technology in the Italian clinical practice.

**Methods:** Consecutive patients (pts) undergoing AF ablation from the CHARISMA registry at 5 Italian centres were included. Protocol-directed cryoablation was delivered for 180 sec or 240 sec according to operator's preference for isolation achieved in  $\leq 60$  sec, or 240 sec if isolation occurred  $> 60$  sec or when time to isolation (TTI) was not available. The ablation endpoint was PV isolation as assessed by entrance and exit block.

**Results:** Two-hundred sixty-two cryoapplications from 49 pts (194 PVs) were analyzed. PVI was achieved with cryoablation only in all pts. The mean number of freeze applications per pt was  $5.3 \pm 1.5$  ( $1.3 \pm 0.6$  for LIPV, LSPV and RSPV,  $1.6 \pm 1.3$  for RIPV), with 143 (73.7%) PVs treated in a single-shot fashion (38, 19.6% with 2 shots; 13, 6.7% with more than 2 shots). Sixteen (33%) pts were treated with a single freeze to each of the PVs. The mean nadir temperature was  $-55.5 \pm 6.9$  °C and was colder than  $-50$  °C in 83% of the PVs. TTI information was evaluable in 120 (46%) cryoapplications with a median TTI of 47 [32-75] sec (median temperature at TTI =  $-49$  [-53 to  $-42$ ] °C). The mean time to target  $-40$  °C (TTT) was  $30.1 \pm 6.9$  sec with a TTT  $< 60$  sec achieved in 99.2% of the cryoapplications; the mean thaw time to 0 °C was  $18.6 \pm 5.8$  sec (thaw time  $> 15$  sec in 70.3% of the cryoapplications). The mean PV occlusion grade (rank 1-4) was  $3.6 \pm 0.6$  (grade 2 in 5.2% of the cases, grade 3 in 25.6% and grade 4 in 69.2%). No complications were observed at 30 days post-procedure.

**Conclusion:** In this first multicentric experience in a clinical practice setting, the novel cryo-balloon system proved to be safe and effective and resulted in a high proportion of successful single-freeze isolation. Cooling parameters seem to be slightly different from reference cryo-balloon technology.
